# Supplementary material
Source: Springer Nature journal article supplement (https://www.springermedizin.de/resource/supplementary/12885_2013_4477_MOESM1_ESM.pdf/9466526)
Supplement: MOESM1 [file 9466526]

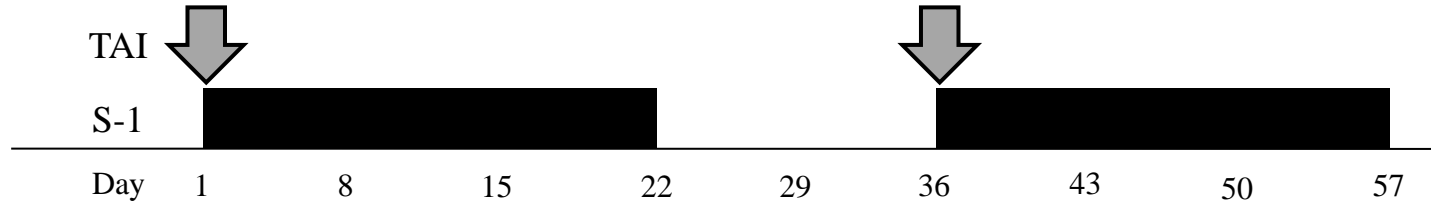

| Parameters        |         | CDDP (mg/m <sup>2</sup> ) | S-1 (mg)              |                                                |                     |
|-------------------|---------|---------------------------|-----------------------|------------------------------------------------|---------------------|
| Body surface area |         |                           | < 1.25 m <sup>2</sup> | ≥ 1.25 m <sup>2</sup> and < 1.5 m <sup>2</sup> | ≥ 1.5m <sup>2</sup> |
| Dose level        | Level 0 | 50                        | 50                    | 60                                             | 80                  |
|                   | Level 1 | 65                        | 50                    | 60                                             | 80                  |
|                   | Level 2 | 65                        | 60                    | 80                                             | 100                 |
|                   | Level 3 | 65                        | 80                    | 100                                            | 120                 |
